# Supplementary material
Source: PubMed Central journal article supplement (PMC8785841)

**Suppl Fig 1. STARD flow diagram for a study of 536 patients from the nephrology clinic for ADPKD diagnosis status.**

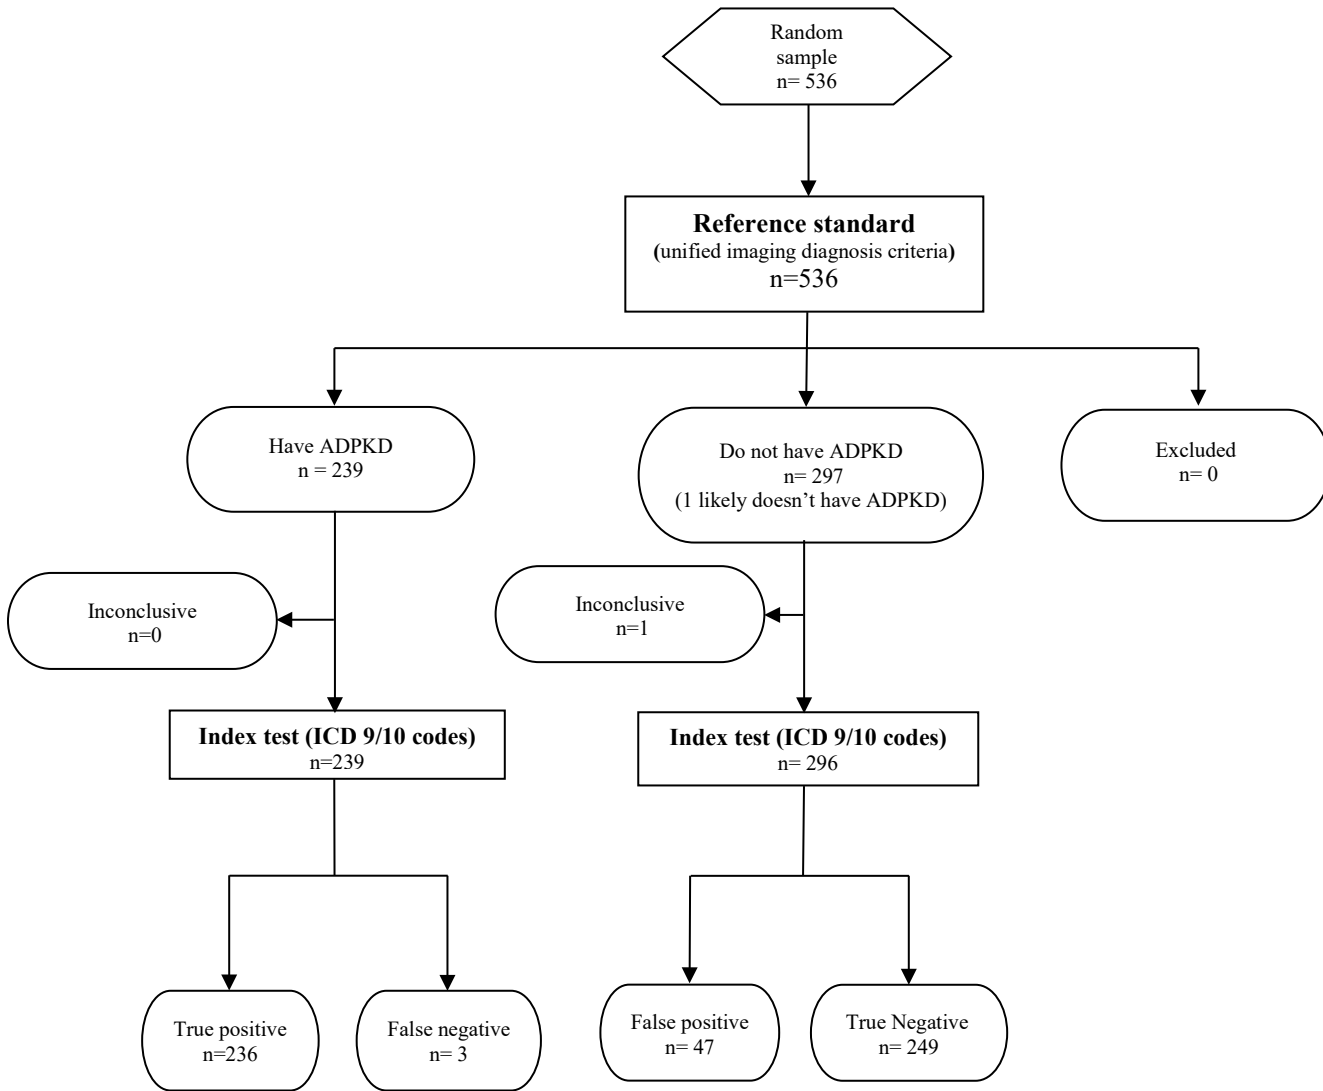

**Suppl Fig 2. STARD flow diagram for a study of 535 patients who don't have nephrology visits for ADPKD diagnosis status.**

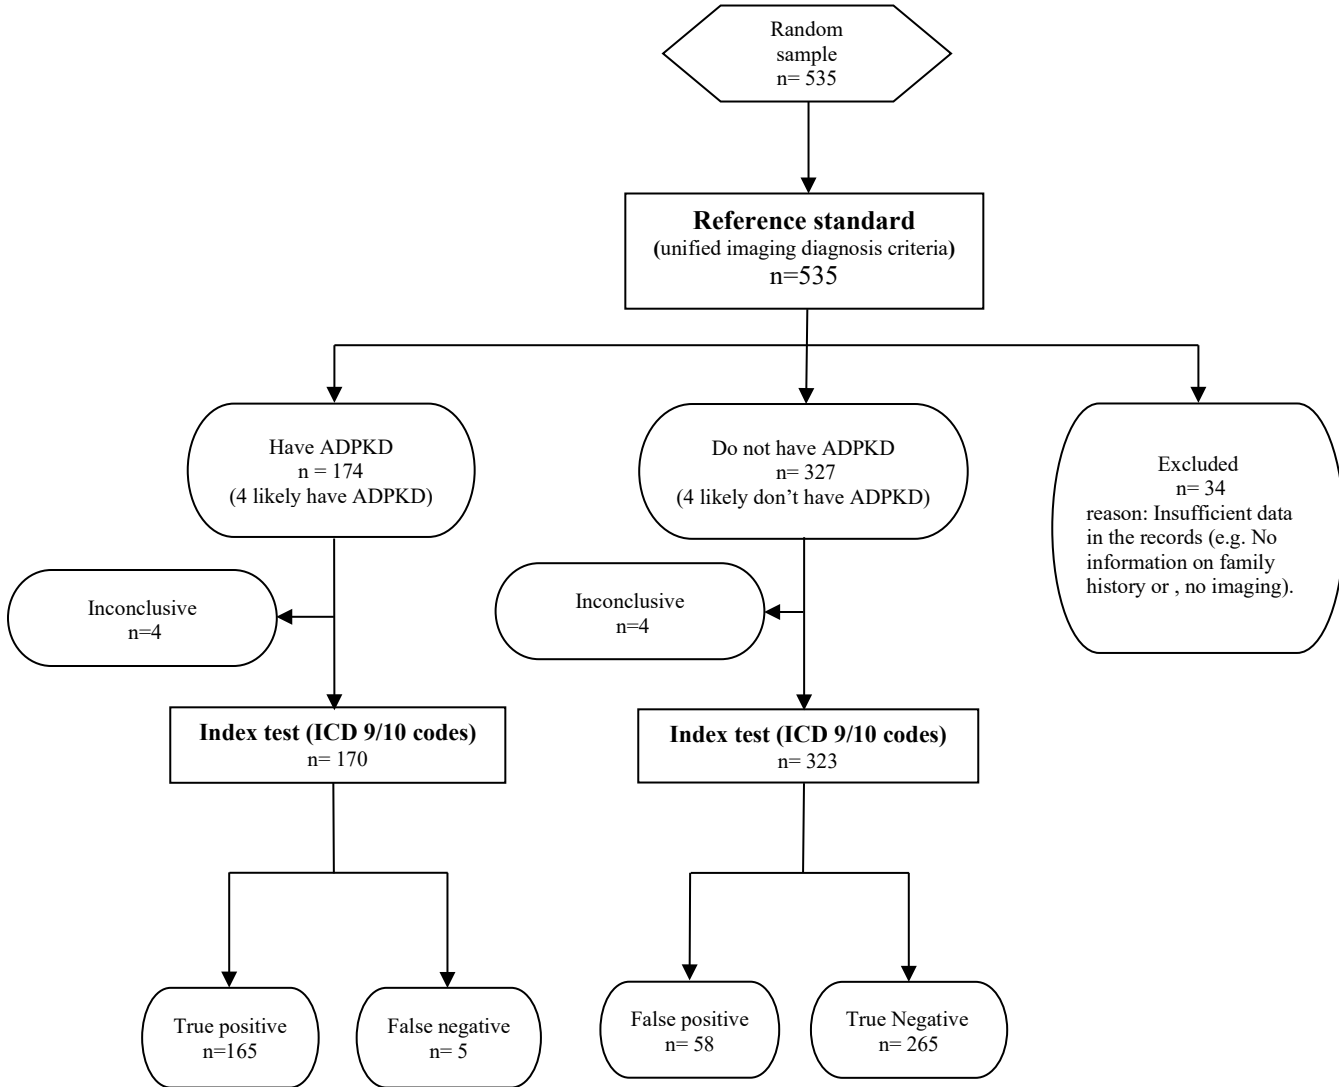

Supplement: 7226_2_supp_90179_qzj72g.pdf [file 7226_2_supp_90179_qzj72g.pdf]
